# Supplementary material
Source: PubMed Central journal article supplement (PMC2570590)
Supplement: NIHMS62801-supplement-1File002.pdf [file NIHMS62801-supplement-1File002.pdf]

## Supporting Information

**Supporting Information Figure 1.** Determination of the Kinetic Constants for GABA-AT catalyzed elimination of HF from (*R*)-**2**. The equations that represent these data and the association constant are displayed on the graphs.

| [R-3-F-GABA] (mM) (S) | $\delta A/\text{min}$ (v) | 1/[S] | $\delta \text{NADPH}/\text{min}$ (umol/min) | 1/v (min/umol) | [S]/v (mM*min/umol) |
|-----------------------|---------------------------|-------|---------------------------------------------|----------------|---------------------|
| 0.5000                | 0.024970                  | 2     | 0.15531340                                  | 6.438594481    | 3.21929724          |
| 0.2500                | 0.022000                  | 4     | 0.13684000                                  | 7.307804735    | 1.826951184         |
| 0.1250                | 0.018740                  | 8     | 0.11656280                                  | 8.579066392    | 1.072383299         |
| 0.0500                | 0.013150                  | 20    | 0.08179300                                  | 12.22598511    | 0.611299255         |
| 0.0250                | 0.007910                  | 40    | 0.04920020                                  | 20.32512063    | 0.508128016         |
| 0.0125                | 0.005277                  | 80    | 0.03282045                                  | 30.46880646    | 0.380860081         |

[GABA-AT] = 9.81mg/mL

so each rxn contains

0.032667mg

$\delta \text{Abs}/\text{min} * 6.22 \text{mM}/\text{cm}^{-1}$

accounts for conversion to

umol (divide by 1000 to convert mL to L then

multiply by 1000 to convert mmol to umol)

pathlength is 1cm

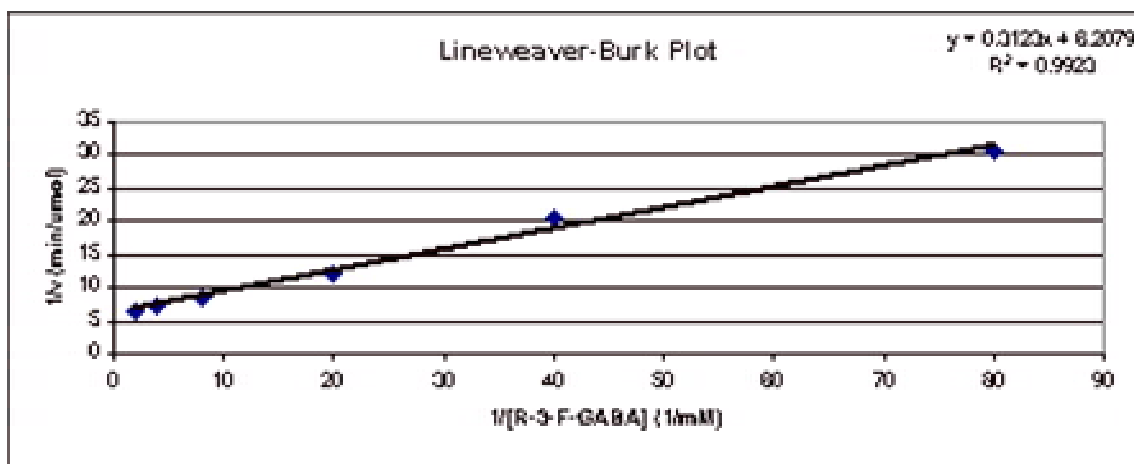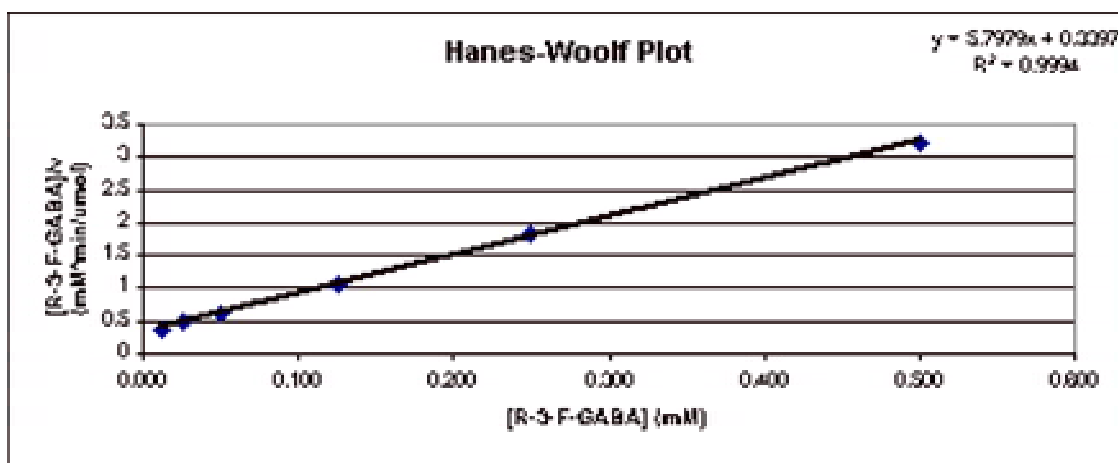

**Supporting Information Figure 2.** Representative plots of the increase in  $[F^-]$  (as determined from the electric potential across a calibrated electrode) as a function of time for (*R*)-**2** (**A**) and (*S*)-**2** (**B**). The equations that represent these data and the association constant are displayed on the graphs.

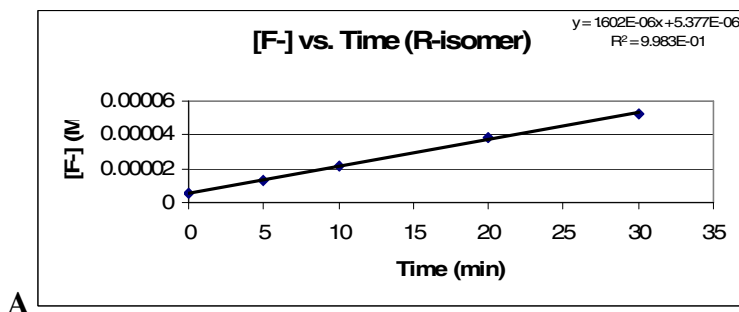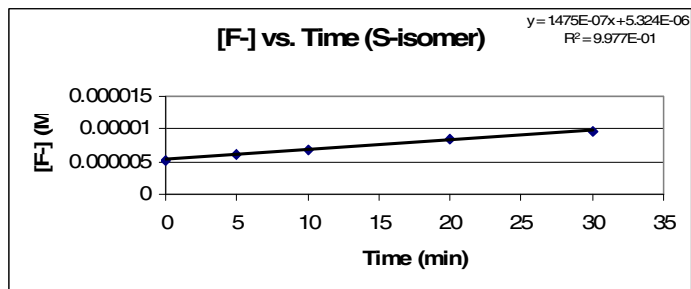

**Supporting Information Figure 3.** Dixon (A) and Cornish-Bowden (B) plots constructed with the data shown in Supporting Information Table 1 below. The equations for the least-square regression lines are omitted but all  $r^2$  values are greater than 0.98 in the case of the Dixon plot ( $1/v$  vs. [Inhibitor]) and greater than 0.97 in the case of the Cornish-Bowden plot ( $[\text{Substrate}]/v$  vs. [Inhibitor]).

**A**

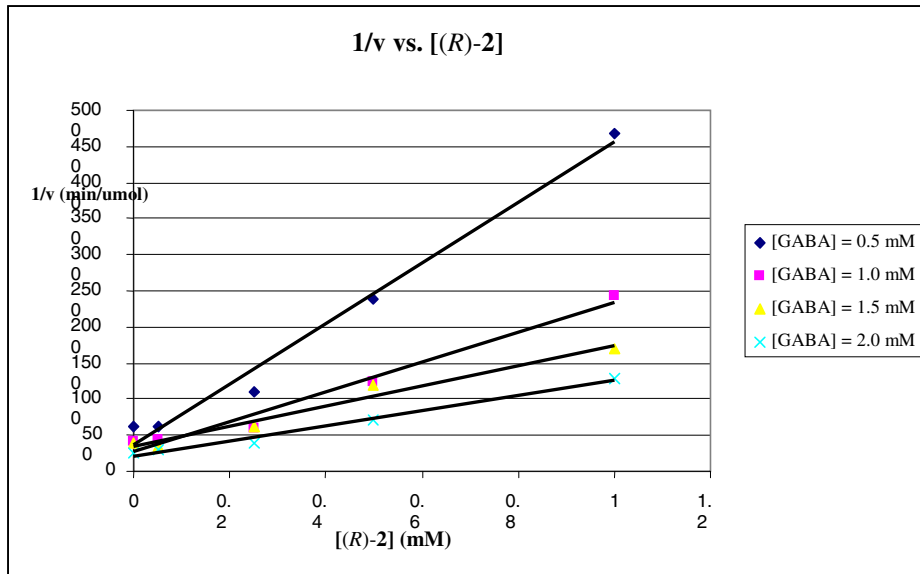

**B**

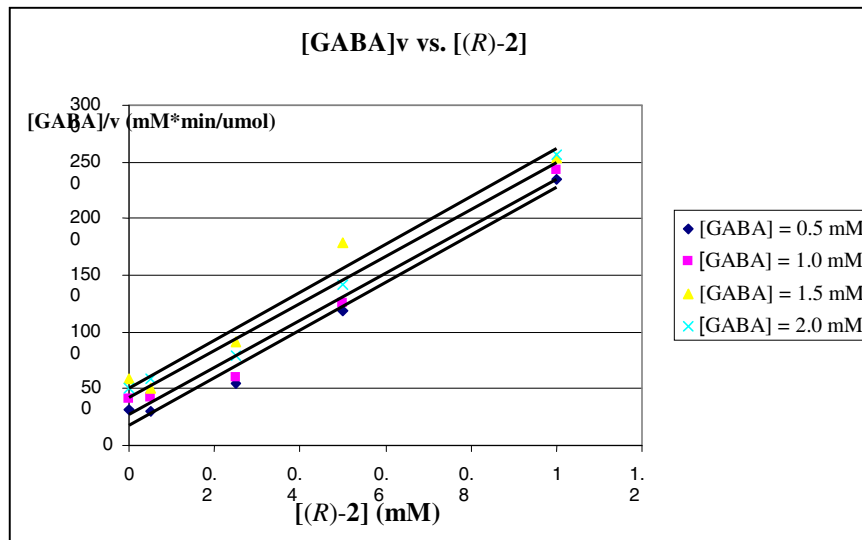

**Supporting Information Table 1.** Summary of the data collected to determine the (R)-2 mediated inhibition of GABA transamination.

| <b>[GABA] (mM)</b>  | <b>0.500</b>    | <b>1.000</b>    | <b>1.500</b>    | <b>2.000</b>    |
|---------------------|-----------------|-----------------|-----------------|-----------------|
| <b>[(R)-2] (mM)</b> | <b>Rate (v)</b> | <b>Rate (v)</b> | <b>Rate (v)</b> | <b>Rate (v)</b> |
| 0.000               | 0.001615        | 0.002436        | 0.002532        | 0.003923        |
| 0.050               | 0.001636        | 0.002337        | 0.002973        | 0.003405        |
| 0.250               | 0.000913        | 0.001683        | 0.001633        | 0.002509        |
| 0.500               | 0.000420        | 0.000800        | 0.000843        | 0.001413        |
| 1.000               | 0.000214        | 0.000413        | 0.000591        | 0.000781        |

**Supporting Information Figure 4.** Crystal structure of the active site of GABA-AT. PDB code 1OHV; SYBYL Molecular Modeling Package, version 6.9, Tripos; St. Louis, MO, 2002. <http://www.tripos.com>

QuickTime™ and a  
TIFF (LZW) decompressor  
are needed to see this picture.
